# Supplementary material for: Bio-CaRGOS: capture and release gels for optimized storage of hemoglobin
Source: Royal Society of Chemistry journal article supplement (doi:10.1039/d1ra00987g), 2021-01-01
Supplement: d1ra00987g1.pdf [file d1ra00987g1.pdf]

## Supporting Information

# Bio-CaRGOS: Capture and Release Gels for Optimized Storage of hemoglobin

Jack Boylan<sup>a‡</sup>, Rajat Chauhan<sup>b‡</sup>, Kavya Koneru<sup>a</sup>, Meenakshi Bansal<sup>c</sup>, Theodore Kalbfleisch<sup>a</sup>,

Chinmay S. Potnis<sup>d</sup>, Kendall Hartline<sup>c</sup>, Robert S. Keynton<sup>b</sup>, Gautam Gupta<sup>a\*</sup>

<sup>[a]</sup> Department of Chemical Engineering, University of Louisville, Louisville, Kentucky 40292, United States

<sup>[b]</sup> Department of Bioengineering, University of Louisville, Louisville, Kentucky 40292, United States

<sup>[c]</sup> Department of Chemistry, Thomas More University, Crestview Hills, KY, 41017

<sup>[d]</sup> Department of Chemistry, University of Louisville, Louisville, Kentucky 40292, United States

|                        |          |
|------------------------|----------|
| <b>FIGURE S1</b> ..... | <b>2</b> |
| <b>FIGURE S2</b> ..... | <b>3</b> |
| <b>FIGURE S3</b> ..... | <b>4</b> |
| <b>FIGURE S4</b> ..... | <b>5</b> |
| <b>FIGURE S5</b> ..... | <b>5</b> |

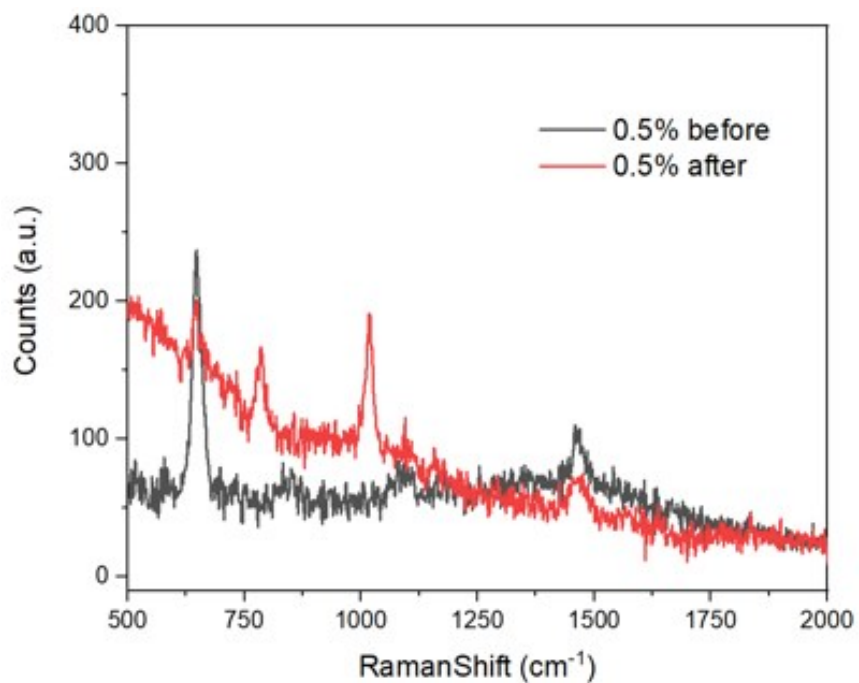

Figure S1. Complete hydrolysis of 0.5 v/v % tetramethyl orthosilicate (TMOS) was demonstrated by Raman spectra with a elimination of TMOS peak (646 cm<sup>-1</sup>) and formation of methanol peak (1030 cm<sup>-1</sup>) after a standard microwave synthesis.

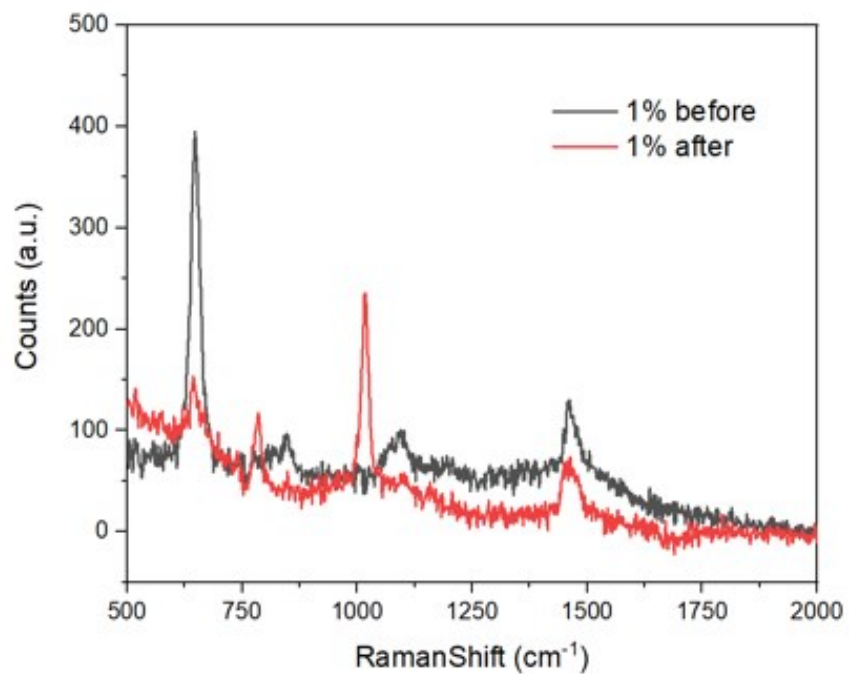

Figure S2. Complete hydrolysis of 1.0 v/v % tetramethyl orthosilicate (TMOS) was demonstrated by Raman spectra with a elimination of TMOS peak (646 cm<sup>-1</sup>) and formation of methanol peak (1030 cm<sup>-1</sup>) after a standard microwave synthesis.

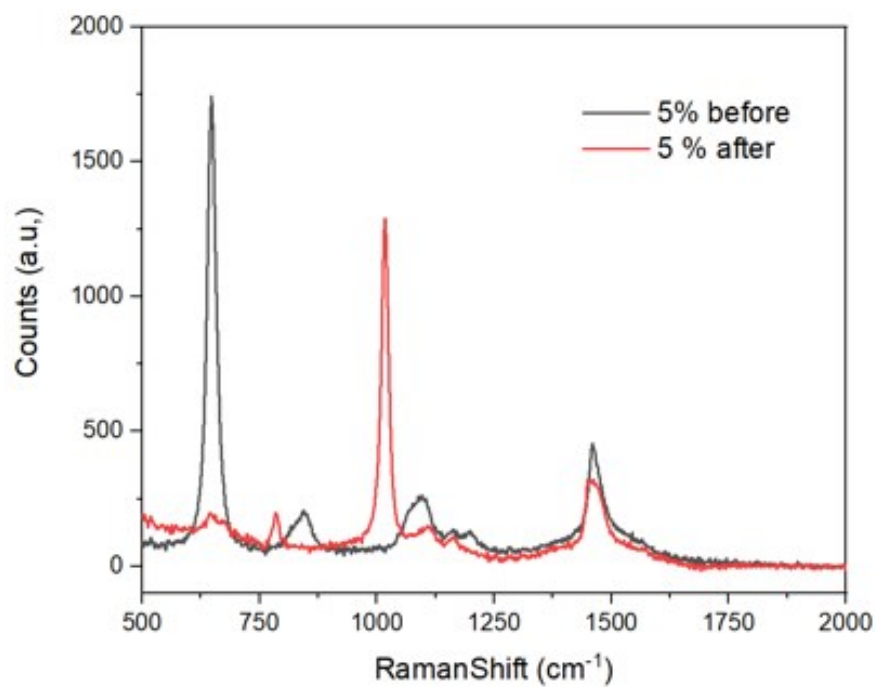

Figure S3. Complete hydrolysis of 5.0 v/v % tetramethyl orthosilicate (TMOS) was demonstrated by Raman spectra with a elimination of TMOS peak (646 cm<sup>-1</sup>) and formation of methanol peak (1030 cm<sup>-1</sup>) after a standard microwave synthesis.

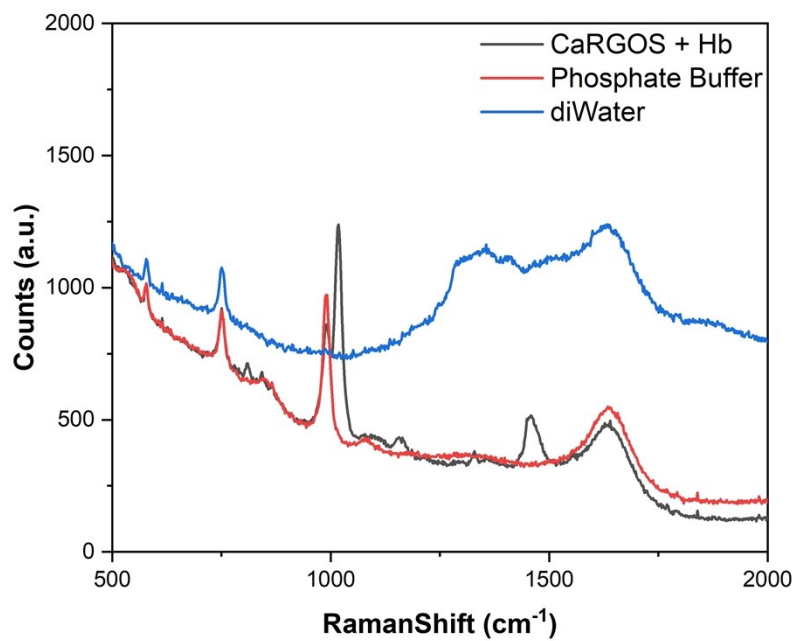

Figure S4. Raman spectra of CaRGOS formulations (5.0 v/v %) with hemoglobin and control solutions (phosphate buffer and Deionized water).

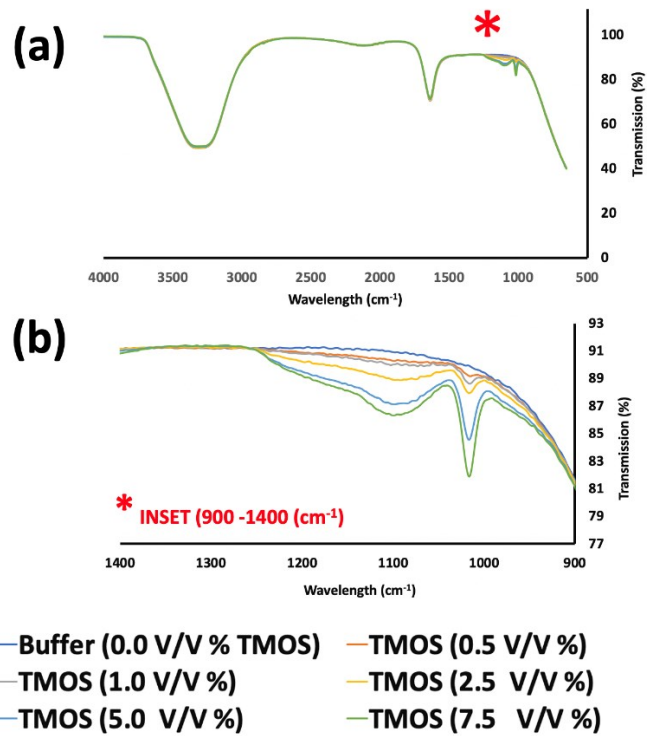

Figure S5. Figure 1: TMOS gel formation as displayed by FT-IR (ATR) spectra at (A) 500 -4000  $\text{cm}^{-1}$  (B) TMOS region (900-1400)  $\text{cm}^{-1}$ .
